# Supplementary material for: The importance of the rotor in hydrazone-based molecular switches
Source: publisher site journal article supplement (doi:10.3762/bjoc.8.98), 2012-06-13
Supplement: Additional file 1 [file 1860-5397-8-98-S1.pdf]

# Supporting Information

for

## **The importance of the rotor in hydrazone-based molecular switches**

Xin Su<sup>1</sup>, Timo Lessing<sup>2</sup> and Ivan Aprahamian\*<sup>1</sup>

Address: <sup>1</sup>Department of Chemistry, Dartmouth College, Hanover, New

Hampshire 03755, United States and <sup>2</sup>Department of Chemistry,

Heinrich-Heine-Universität Düsseldorf, Universitätsstr. 1, 40225 Düsseldorf,

Germany

Email: [ivan.aprahamian@dartmouth.edu](mailto:ivan.aprahamian@dartmouth.edu)

Homepage: [www.dartmouth.edu/~aprahamian](http://www.dartmouth.edu/~aprahamian)

\* Corresponding author

## **Experimental section and acid titration of the hydrazone compounds**

## Table of Contents

|                                                 |    |
|-------------------------------------------------|----|
| Experimental section.....                       | S3 |
| Acid titration of the hydrazone compounds ..... | S4 |

## **Experimental section**

**General:** All reagents and starting materials were purchased from Acros, Alfa Aesar and TCI-America, and used without further purification. Column chromatography was performed on silica gel (Silicycle, 230–400 mesh). The melting point was measured on an Electrothermal 9100 instrument in open capillary tubes without thermometer correction. Deuterated solvents were purchased from Cambridge Isotope Laboratories and used as received. NMR spectra were recorded on a 500 MHz spectrometer, with working frequencies of 499.87 MHz for  $^1\text{H}$  nuclei and 125.7 MHz for  $^{13}\text{C}$  nuclei, respectively. Chemical shifts are quoted in ppm relative to tetramethylsilane, using the residual solvent peak as a reference standard.

## Acid titration of the hydrazone compounds

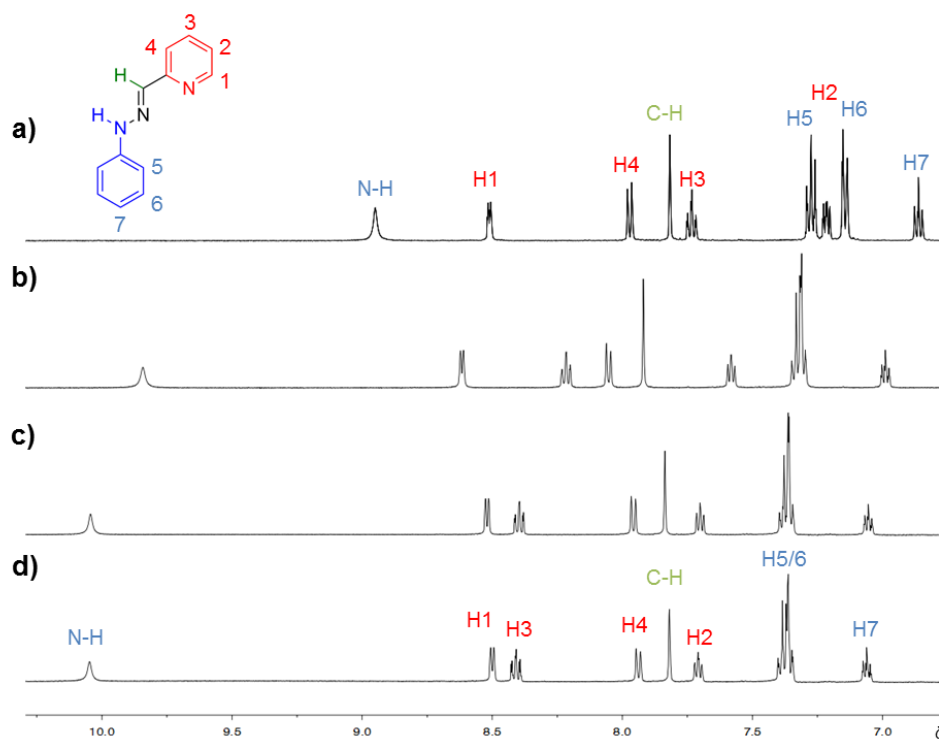

**Figure S1:** The titration of **PPH-2** with TFA followed by  $^1\text{H}$  NMR spectroscopy ( $\text{CD}_3\text{CN}$ , 294 K). The **PPH-2** solution ( $1.0 \times 10^{-2}$  M) was titrated with 0, 1, 3 and 5 equiv of TFA (a–d respectively).

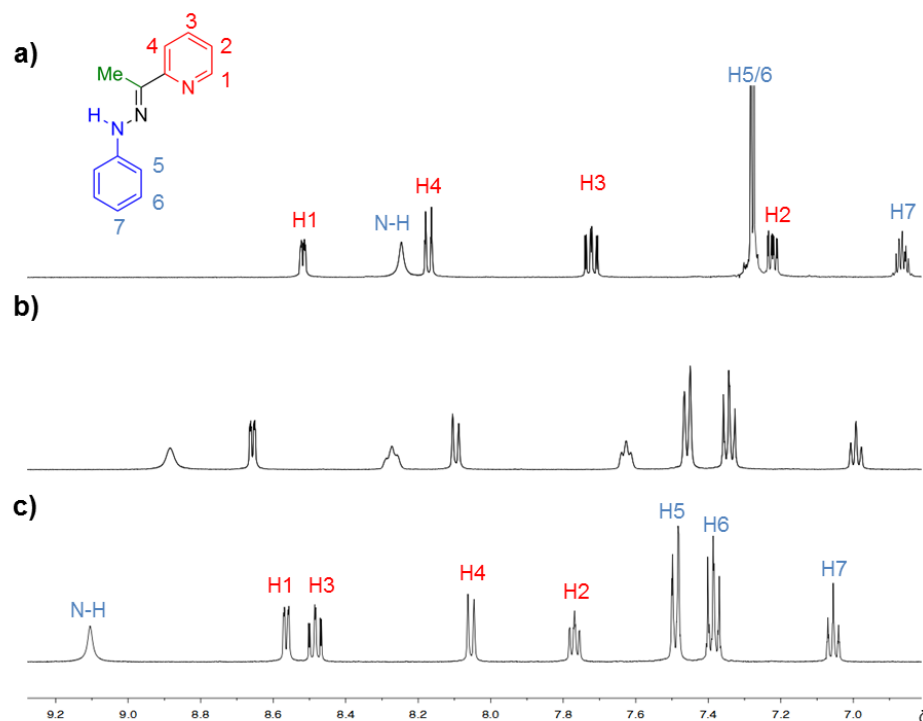

**Figure S2:** The titration of **PPH-3** with TFA followed by  $^1\text{H}$  NMR spectroscopy ( $\text{CD}_3\text{CN}$ , 294 K). The **PPH-3** solution ( $1.0 \times 10^{-2}$  M) was titrated with 0, 1, and 3 equiv of TFA (a–c respectively).

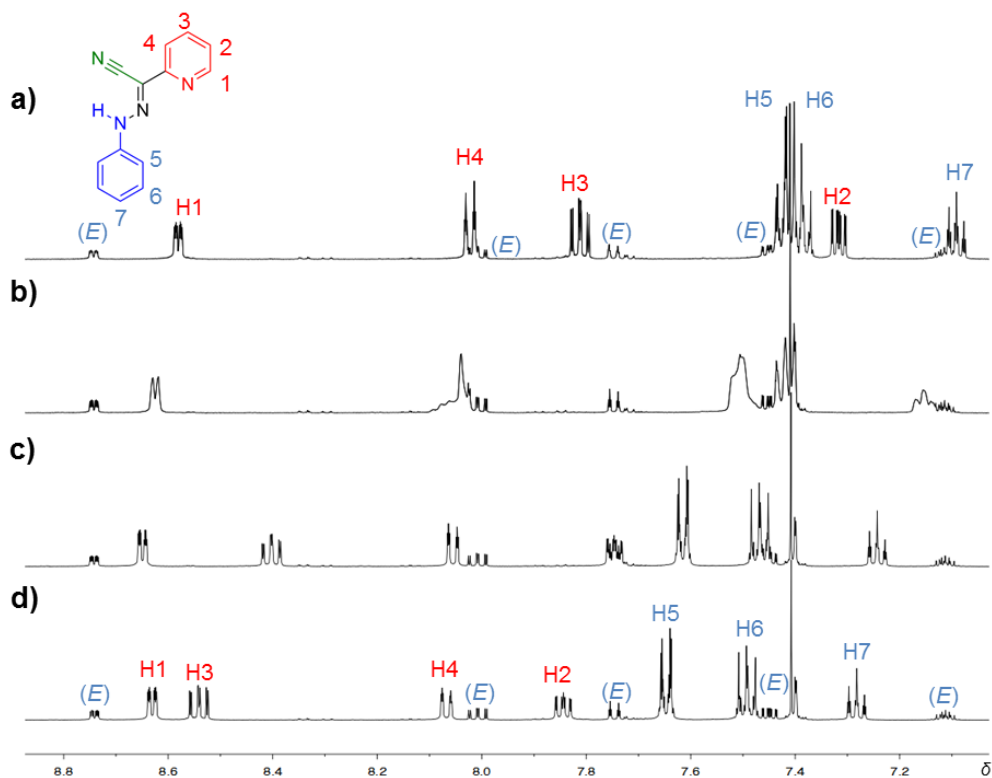

**Figure S3:** The titration of **PPH-4** with TFA followed by  $^1\text{H}$  NMR spectroscopy ( $\text{CD}_3\text{CN}$ , 294 K). The **PPH-4** solution ( $1.0 \times 10^{-2}$  M) was titrated with 0, 1, 4 and 10 equiv of TFA (**a-d** respectively).

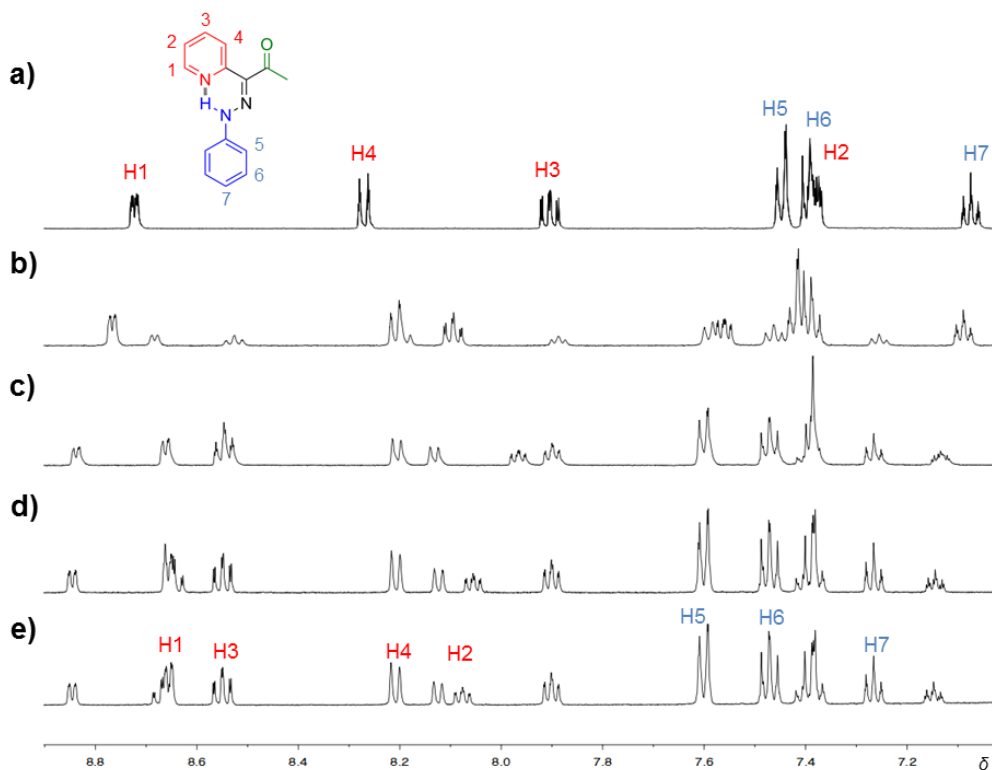

**Figure S4:** The titration of **PPH-5** with TFA followed by  $^1\text{H}$  NMR spectroscopy ( $\text{CD}_3\text{CN}$ , 294 K). The **PPH-5** solution ( $1.0 \times 10^{-2}$  M) was titrated with 0, 2.4, 10, 20 and 30 equiv of TFA (**a-e** respectively).
